# Supplementary material for: Molecular phylogeny and divergence times of Astragalus section Hymenostegis: An analysis of a rapidly diversifying species group in Fabaceae
Source: Sci Rep. 2017 Oct 25;7:14033. doi: 10.1038/s41598-017-14614-3 (PMC5656595; doi:10.1038/s41598-017-14614-3)
Supplement: Supplementary file 1 — Supplementary information [file 41598_2017_14614_MOESM1_ESM.pdf]

**Molecular phylogeny and divergence times of *Astragalus* section *Hymenostegis*: An analysis of a currently diversifying species group in Fabaceae**

**Ali Bagheri<sup>1\*</sup>, Ali Asghar Maassoumi<sup>2</sup>, Mohammad Reza Rahiminejad<sup>1</sup>, Jonathan Brassac<sup>3</sup>, Frank R. Blattner<sup>3,4</sup>**

<sup>1</sup>Department of Biology, Faculty of Sciences, University of Isfahan, Isfahan, 81746-73441, Iran

<sup>2</sup>Botany Research Division, Research Institute of Forests and Rangelands, Agricultural Research, Education and Extension Organization (AREEO), 13185-116, Tehran, Iran

<sup>3</sup>Leibniz Institute of Plant Genetics and Crop Plant Research (IPK), 06466 Gatersleben, Germany

<sup>4</sup>German Centre of Integrative Biodiversity Research (iDiv) Halle-Jena-Leipzig, 04103 Leipzig, Germany

\*a.bagheri@sci.ui.ac.ir

**Supplemental online materials**

**Table S1** Individuals analyzed.

| Sp.                       | Loc.                                     | Alt. | Herb. No.    | Coll.                   | ITS        | ycf1     |
|---------------------------|------------------------------------------|------|--------------|-------------------------|------------|----------|
| <i>A. altiusculus</i>     | Qazvin: Alamut, vicinity of Evan Lake    | 1600 | 97943        | Bagheri                 | LT622362   | -        |
|                           | Qazvin: Alamut, Moallem Kelayeh          | 2100 | 50998 (Holo) | Assadi & Maassoumi      | LT622361   | -        |
| <i>A. anguranensis</i>    | Zanjan: Dandi to Aghkand                 | 2300 | 98282        | Bagheri                 | LT622366   | -        |
|                           | Zanjan: Mahneshan to Pari                | 2300 | 98281        | Bagheri                 | LT622365   | -        |
|                           | Zanjan: Mahneshan, Damirlu Mt.           | 2600 | 100454       | Mahmoodi                | LT622367   | -        |
|                           | Zanjan: Mahneshan, Anguran, Belgheis Mt. | 2800 | 78520 (Holo) | Maassoumi & Mozaffarian | LT622364   | KY071131 |
|                           | Zanjan: Mahneshan, Anguran               | 2300 | 64809        | Maassoumi               | LT622363   | -        |
| <i>A. angustispicatus</i> | Mazandaran: Hezar, Abgarm                | 2250 | 33142        | Assadi & Mozaffarian    | ✓          | -        |
|                           | Tehran: Damavand, Chenar to Daryache Tar | 2700 | 78017        | Mozaffarian             | LT622369   | -        |
| <i>A. annularis</i>       | Iran                                     | -    | 51921        | Maassoumi & Abouhamzeh  | AB051912.1 | -        |
| <i>A. askius</i>          | Iran                                     | -    | 6344         | Riazi                   | AB231113.1 | -        |

| Sp.                           | Loc.                                     | Alt. | No.                    | Coll.                  | ITS                  | ycf1          |
|-------------------------------|------------------------------------------|------|------------------------|------------------------|----------------------|---------------|
| <i>A. assadabadensis</i>      | Hamedan: Assadabad                       | 2250 | <b>5009</b>            | Safikhani et al.       | KP658436.1           | -             |
|                               | Hamedan: Assadabad                       | 2000 | <b>101441</b>          | Rahiminejad & Bagheri  | LT622370             | -             |
|                               | Hamedan: Assadabad                       | 2030 | <b>278 (MSB) (Iso)</b> | Gharemani-nejad        | LT622371             | KY071132      |
|                               | Lorestan: Garrin                         | -    | <b>s.n.</b>            | Dehshiri               | LT622373             | -             |
|                               | Hamedan: Hamadan to Qorveh               | 2480 | <b>65000 (MSB)</b>     | Mozaffarian            | LT622372             | -             |
| <i>A. asteris</i>             | Iran                                     | -    | <b>30957</b>           | Runemark & Mozaffarian | AB051917.1           | -             |
| <i>A. _atrokurdicus</i>       | Zanjan: Zanjan to Bijar                  | 1550 | <b>6911</b>            | Bagheri                | LT622374             | -             |
| <i>A. austrokhorensis</i>     | Gorgan: Shahrud, Tash to Gorgan          | 2800 | <b>85446<br/>85454</b> | Assadi & Hamdi         | LT622375<br>LT622376 | -<br>KY071133 |
| <i>A. austromaheshanensis</i> | Zanjan: Mahneshan                        | 2160 | <b>8955 (Holo)</b>     | Bagheri                | LT622377             | KY071134      |
|                               | Zanjan: Dandi to Tekab                   | 2300 | <b>98290</b>           | Bagheri                | LT622378             | -             |
| <i>A. austrotaromenensis</i>  | Zanjan: Zanjan to Tarom                  | 2250 | <b>6942</b>            | Bagheri                | LT622379             | -             |
| <i>A. bashmaghensis</i>       | Kurdistan: Saghez, Divandarreh, Bashmagh | 2300 | <b>70063 (Holo)</b>    | Mozaffarian            | LT622380             | KY071135      |

| Sp.                    | Loc.                                              | Alt. | No.                                           | Coll.                                 | ITS                  | yc/f     |
|------------------------|---------------------------------------------------|------|-----------------------------------------------|---------------------------------------|----------------------|----------|
| <i>A. blattneri</i>    | East Azarbayejan: Kiamaki Dagh                    | 2040 | <b>55288</b><br><b>(MSB)</b>                  | Podlech,<br>Maassoumi<br>& Zarre      | LT622381             | -        |
|                        | East Azarbayejan: Tabriz to Bostanabad, Saeidabad | 2000 | <b>97989</b><br><b>97990</b><br><b>(Holo)</b> | Bagheri                               | LT622382<br>LT622383 | -<br>-   |
| <i>A. bounophillus</i> | Tehran: Damavand Mt.                              | -    | <b>313</b><br><b>(MSB)</b><br><b>(Iso)</b>    | Kotschy                               | LT622385             | -        |
|                        | Mazandaran: Kojur to Baladeh                      | 2650 | <b>98552</b><br><b>98560</b>                  | Bagheri                               | LT622387<br>LT622388 | -<br>-   |
|                        | Qazvin: Alamut, Moallem Kelayeh                   | 1800 | <b>97947</b>                                  | Bagheri                               | LT622386             | -        |
|                        | Mazandaran: Drre Lar                              | 2500 | <b>13423</b>                                  | Wendelbo<br>& Assadi                  | LT622384             | -        |
|                        | Mazandaran: Baladeh to Pole Zanguleh              | -    | <b>98562</b><br><b>98563</b>                  | Bagheri                               | LT622389<br>LT622390 | -<br>-   |
| <i>A. bradosticus</i>  | West Azarbayejan: Uromieh, Mvana, Hakki           | 2100 | <b>75424</b>                                  | Mozaffarian,<br>Maassoumi<br>& Safavi | LT622391             | -        |
|                        | West Azarbayejan: Uromieh, Mvana, Hakki           | 2100 | <b>75442</b><br><b>(Holo)</b>                 | Mozaffarian,<br>Maassoumi<br>& Safavi | LT622392             | KY071136 |

| Sp.                                                  | Loc.                                         | Alt. | No.                                   | Coll.                           | ITS      | ycf<br>1 |
|------------------------------------------------------|----------------------------------------------|------|---------------------------------------|---------------------------------|----------|----------|
| <i>A. brunsi</i>                                     | Semnan: Shahmirzad to Fuladmahaleh           | 2300 | <b>40443</b>                          | Assadi& Mozaffarian             | LT622395 | -        |
|                                                      | Tehran: Doshan Tapeh                         | -    | <b>s.n. (B-14)<br/>(B)<br/>(Holo)</b> | Bruns                           | LT622396 | KY071137 |
|                                                      | Zanjan: Gheydar, Dehjalal                    | 2140 | <b>101469</b>                         | Bagheri                         | LT622393 | -        |
|                                                      | Tehran: Bibi Shahbanu Mt.                    | 1350 | <b>15215</b>                          | Babakhanlou & Amin              | LT622394 | -        |
| <i>A. callistachys</i><br>(sect. <i>Microphysa</i> ) | Esfahan: Golpayegan to Muteh                 | 1850 | <b>76713</b>                          | Maassoumi & Mozaffarian         | LT622397 | KY071138 |
| <i>A. campylanthus</i><br>( <i>Campylanthus</i> )    | Markazi: Arak, Khan-e Miran, Sefid Khany Mt. | 2850 | <b>63774</b>                          | Mozaffarian                     | LT622398 | KY071139 |
| <i>A. capax</i>                                      | Tehran: Damavand Mt.                         | 3300 | <b>64734<br/>(Holo)</b>               | Khatamsaz, Akhiani & Abouhamzeh | LT622399 | -        |
| <i>A. cephalanthus</i><br>(sect. <i>Microphysa</i> ) | Fars: Dasht-e Arjan, Kazeron, Kotal Pirehzan | 2400 | <b>17497 (G)</b>                      | Foroughi                        | LT622400 | KY071140 |
| <i>A. chehreganii</i>                                | West Azarbayejan: Salmas, Serrow             | 1840 | <b>98433</b>                          | Maassoumi & Bagheri             | LT622404 | -        |
|                                                      | West Azarbayejan: Serrow to Salmas           | 1700 | <b>98410</b>                          | Rahiminejad & Bagheri           | LT622402 | -        |
|                                                      | West Azarbayejan: Uromieh, Ghoushchi         | 1550 | <b>98412</b>                          | Maassoumi & Bagheri             | LT622403 | -        |
|                                                      | West Azarbayejan: Uromieh, Ghoushchi         | 1850 | <b>41877<br/>(MSB)<br/>(Iso)</b>      | Rechinger                       | LT622401 | KY071141 |

| Sp.                                            | Loc.                                            | Alt. | No.                                     | Coll.              | ITS      | ycf1     |
|------------------------------------------------|-------------------------------------------------|------|-----------------------------------------|--------------------|----------|----------|
| <i>A. chrysostachys</i>                        | Isfahan, (Aderbaydan!!)                         | -    | <b>4401-A</b><br>(MSB)                  | Aucher-Eloy        | LT622405 | KY071142 |
|                                                | Zanjan: Mahneshan                               | 2200 | <b>6809</b>                             | Bagheri            | LT622406 | -        |
|                                                | West Azarbayejan:Uromieh to Oshnavyeh, Ghasemlo | 1500 | <b>98078</b>                            | Bagheri            | LT622407 | -        |
|                                                | Zanjan: Mahneshan to Pari                       | 2300 | <b>98277</b>                            | Bagheri            | LT622408 | -        |
| <i>A. chrysostachys</i> var <i>dolichourus</i> | Siwend                                          | -    | <b>1073</b><br>(WU) (Holo)              | Stapf              | LT622409 | -        |
| <i>A. chrysostachys</i> var <i>parisiensis</i> | Lorestan: Paris Mt.                             | -    | <b>15880</b><br>(W)<br>(Holo) 1958-7596 | Koelz              | LT622410 | -        |
| <i>A.chrysostacys</i> var <i>khorsanicus</i>   | Khorasan: Kopet-Dagh Mt., Alamali               | 1600 | <b>4802 (4804)</b><br>(MSB)<br>(Holo)   | Rechinger & Aellen | LT622411 | -        |
| <i>A. ciloensis</i>                            | Turkey, Hakkari, Cilo Mt.                       | 2750 | <b>23974</b><br>(M)<br>(Holo)           | Davis & Polunin    | LT622412 | KY071143 |
|                                                | Turkey: Muradiye                                | 2640 | <b>2765</b>                             | Karaman            | LT622413 | -        |

| Sp.                      | Loc.                                          | Alt. | No.                 | Coll.                      | ITS        | ycfl       |
|--------------------------|-----------------------------------------------|------|---------------------|----------------------------|------------|------------|
| <i>A. conicus</i>        | Khorasan: Ghuchan to Dareh Gaz                | 1820 | <b>21424</b>        | Assadi & Maassoumi         | LT622414   | -          |
|                          | Khorasan: Dareh Gaz                           | 1840 | <b>225</b>          | Vafaii                     | LT622415   | -          |
|                          | Khorasan: Binalud                             | -    | <b>23</b>           | -                          | LT622416   | KY071144   |
|                          | Khorasan: Mashhad, Torbat heydarieh           | 1020 | <b>38234 (MSB)</b>  | Zarre et al.               | LT622417   | -          |
|                          | Khorasan: Shirvan                             | 2400 | <b>41375 (W)</b>    | Termeh, Moussavi           | LT622418   | -          |
|                          | Khorasan: Quchan                              | 1600 | <b>53723 (M)</b>    | Rechinger                  | LT622419   | -          |
|                          | Khorasan: Ghuchan, Bajgiran                   | 1600 | <b>6314 (W)</b>     | Schmid                     | LT622420   | -          |
|                          | Semnan: Semnan to Firuzkuh                    | 2000 | <b>97903</b>        | Bagheri                    | LT622421   | -          |
| <i>A. dandianus</i>      | Zanjan: Dandi to Tekab                        | 2300 | <b>98283</b>        | Bagheri                    | LT622422   | KY071145   |
| <i>A. demonstratus</i>   | Zanjan: Mahneshan to Pari                     | 2000 | <b>64804 (Holo)</b> | Maassoumi                  | LT622423   | KY071146   |
| <i>A. depressus</i>      | Germany                                       | -    | <b>39745</b>        | Podlech                    | AB231147.1 | JQ801556.1 |
|                          | Italy                                         | -    | <b>- (M)</b>        | Dietrich                   |            |            |
| <i>A. dianat nejadii</i> | East Azarbayejan: Ahar to Kaleybar, Arasbaran | 1550 | <b>69611 (Holo)</b> | Gharemani-Nejad & Zarre    | LT622426   | KY071147   |
|                          | East Azarbayejan: Arasbaran                   | 1800 | <b>55329 (MSB)</b>  | Podlech, Maassoumi & Zarre | LT622425   | -          |
|                          | East Azarbayejan: Arasbaran                   | 1750 | <b>20195</b>        | Assadi & Maassoumi         | LT622424   | -          |

| Sp.                                                   | Loc.                                     | Alt. | No.                    | Coll.                         | ITS        | ycf1     |
|-------------------------------------------------------|------------------------------------------|------|------------------------|-------------------------------|------------|----------|
| <i>A. doghrunensis</i>                                | East Azarbayejan: Arasbaran, Doghrun Mt. | 2800 | <b>23974</b><br>(Holo) | Assadi & Sardabi              | LT622428   | -        |
|                                                       | East Azarbayejan: Arasbaran, Doghrun Mt. | 2500 | <b>23921</b>           | Assadi & Sardabi              | LT622427   | -        |
|                                                       | East Azarbayejan: Arasbaran              | 2550 | <b>70269</b>           | Jamzad et al.                 | LT622429   | -        |
| <i>A. epiglottis</i>                                  | Morocco                                  | -    | <b>45851</b>           | Podlech                       | AB051910.1 | -        |
| <i>A. expetitus</i>                                   | West Azarbayejan: Tekab                  | 2400 | <b>12223</b><br>(Holo) | Wendelbo, Assadi & Shirdelpur | LT622430   | KY071148 |
|                                                       | Zanjan: Dandi to Tekab                   | 2300 | <b>98291</b>           | Bagheri                       | LT622432   | -        |
|                                                       | Zanjan: Dandi to Tekab                   | 2300 | <b>98228</b>           | Bagheri                       | LT622431   | -        |
| <i>A. fasciculifolius</i><br>(sect. <i>Poterium</i> ) | Fars: Nurabad, Babamonir                 | 960  | <b>63414</b>           | Mozaffarian                   | LT622433   | KY071149 |
| <i>A. ferruminatus</i>                                | Lorestan: to Ilam, Shahhabad             | 1510 | <b>24706</b><br>(Holo) | Seraj                         | LT622435   | KY071150 |
|                                                       | Kermanshah: Dalahoo, Kerend              | 2100 | <b>1396</b>            | Hamzehee & Hatami             | LT622434   | -        |
|                                                       | Kermanshah: Eslamabade Gharb             | 1600 | <b>39509</b>           | Zarre et al.                  | LT622436   | -        |
| <i>A. glaucacanthos</i><br>( <i>Poterion</i> )        | Tehran: E. of Tehran                     | 1350 | <b>15102</b>           | Dini & Arazm                  | LT622437   | -        |
| <i>A. glumaceus</i>                                   | Zanjan: Dandi to Tekab                   | 2300 | <b>98284</b>           | Bagheri                       | LT622439   | -        |
|                                                       | Zanjan: Mahneshan to Pari                | 2300 | <b>98280</b>           | Bagheri                       | LT622438   | KY071151 |

| Sp.                    | Loc.                                          | Alt. | No.                             | Coll.                  | ITS                  | ye/f1         |
|------------------------|-----------------------------------------------|------|---------------------------------|------------------------|----------------------|---------------|
| <i>A. gueruenensis</i> | Turkey:Sivas, Gurun                           | 1700 | <b>15070</b><br>(MSB)<br>(Holo) | Huber-Morath           | LT622440             | -             |
|                        | Turkey: Gurun                                 | 1700 | <b>2777</b>                     | Karaman                | LT622441             | -             |
|                        | Turkey, Erzurum                               | 1800 | <b>43485</b><br>(MSB)           | Nydegger               | LT622442             | -             |
|                        | Turkey: Sivas                                 | 1500 | <b>4415</b><br>(B)              | Hein                   | LT622443             | -             |
| <i>A. hakkianus</i>    | West Azarbayejan:Uromieh, Silvana, Haki       | 2100 | <b>98057</b><br><b>98059</b>    | Bagheri                | LT622444<br>LT622445 | KY071152<br>- |
| <i>A. hirticalyx</i>   | Armenia: Syunik                               | 1900 | <b>08-0565</b><br>(M)           | Vitek et al            | LT622446             | -             |
|                        | East Azarbayejan:Arasbaran, Makidi            | 2400 | <b>20216</b>                    | Assadi & Maassoumi     | LT622447             | -             |
| <i>A. hymenocystis</i> | West Azarbayejan:Uromieh, Ghoushchi           | 1550 | <b>98413</b>                    | Maassoumi & Bagheri    | LT622454             | KY071154      |
|                        | West Azarbayejan:Salmas to Uromieh, Ghoushchi | 1650 | <b>57000</b>                    | Maassoumi & Abouhamzeh | LT622452             | -             |
|                        | West Azarbayejan:Uromieh, Ghoushchi           | 1700 | <b>80287</b>                    | Maassoumi & Nikchehreh | LT622453             | -             |
|                        | Turkey: Van                                   | 2700 | <b>53881</b><br>(W)             | Rechinger              | LT622451             | -             |
|                        | Turkey: Van                                   | -    | <b>2383</b>                     | Mehmet                 | LT622450             | -             |

| Sp.                    | Loc.                                                | Alt. | No.                                                     | Coll.                            | ITS                                                  | ycf1               |
|------------------------|-----------------------------------------------------|------|---------------------------------------------------------|----------------------------------|------------------------------------------------------|--------------------|
| <i>A. dejectus</i>     | Zanjan: Gheydar, Gheydar Mt.                        | 2490 | <b>9084</b><br><b>9079</b><br>(Holo)                    | Bagheri                          | LT622449<br>LT622448                                 | -<br>KY071153      |
| <i>A. hymenostegis</i> | West Azarbayejan:Salmas, Serrow                     | 1840 | <b>98428</b>                                            | Maassoumi<br>& Bagheri           | LT622457                                             | -                  |
|                        | West Azarbayejan:Uromieh, Salmas to<br>Pereshkhoran | 2450 | <b>98072</b>                                            | Bagheri                          | LT622456                                             | KY071155           |
|                        | West Azarbayejan: Seyed Khajeh                      | -    | <b>491</b><br>(MSB)<br>(Iso)                            | Szovits                          | LT622455                                             | -                  |
| <i>A. kapherrianus</i> | Zanjan: Tarom                                       | 2200 | <b>6145</b><br><b>9036</b><br><b>9053</b>               | Bagheri                          | LT622460<br>LT622461<br>LT622462                     | KY071156<br>-<br>- |
|                        | Zanjan: Badamestan                                  | 2000 | <b>41107</b><br>(MSB)                                   | Lamond &<br>Iranshahr            | LT622459                                             | -                  |
|                        | Zanjan , Gilvan                                     | 2350 | <b>41076-E</b><br>(MSB)                                 | Moussavi,<br>Habibi &<br>Tehrani | LT622458                                             | -                  |
| <i>A. karl heinzii</i> | Ardabil: Masuleh to Khalkhal                        | 2100 | <b>86477</b><br>(Holo)                                  | Assadi                           | KT997422.1                                           | -                  |
|                        | Zanjan: Gheydar, Gheydar Mt.                        | 2300 | <b>9</b><br><b>6617</b><br><b>98260</b><br><b>98274</b> | Bagheri                          | KT997425.1<br>KT997424.1<br>KT997426.1<br>KT997423.1 | -<br>-<br>-<br>-   |

| Sp.                      | Loc.                                             | Alt. | No.                       | Coll.                | ITS        | ye/1     |
|--------------------------|--------------------------------------------------|------|---------------------------|----------------------|------------|----------|
| <i>A. kauzarashensis</i> | West Azarbayejan:Salmas, Serrow                  | 1840 | <b>101436</b>             | Maassoumi & Bagheri  | LT622463   | -        |
|                          | West Azarbayejan:Uromieh, Salmas to Kozarash     | 2250 | <b>98062</b>              | Bagheri              | LT622464   | -        |
|                          | West Azarbayejan:Uromieh, Salmas to Pereshkhoran | 2450 | <b>98076</b>              | Bagheri              | LT622465   | -        |
| <i>A. khrudicus</i>      | Alborz: Karaj                                    | 1500 | <b>16030</b>              | Foroughi             | ✓          | -        |
|                          | Tehran: Tehran, Sorkhehesar                      | 1400 | <b>19018 (W)</b>          | Amin & Bazargan      | KT894776.1 | KY071157 |
|                          | Tehran: Tehran, Takestan                         | 1450 | <b>36618</b>              | Assadi & Mozzafarian | KT894777.1 | -        |
|                          | Ghazvin: Saudash-Bulagh                          | 1300 | <b>6874 (B) (Holo)</b>    | Bornmüller           | KT894779.1 | -        |
|                          | Sorkhe Hesar, Haraz road                         | 1530 | <b>12468 (MSB)</b>        | Foroughi et al.      | ✓          | -        |
|                          | Tehran: Ghazvin, Takestan                        | -    | <b>49783 (W.N. 12247)</b> | Termeh               | KT894778.1 | -        |

| Sp.                     | Loc.                                              | Alt. | No.                                  | Coll.               | ITS                  | yc/f     |
|-------------------------|---------------------------------------------------|------|--------------------------------------|---------------------|----------------------|----------|
| <i>A. lagopodioides</i> | Turkey: Agri, Hasiran                             | 2650 | <b>140</b><br>(MSB)                  | Engel               | LT622466             | -        |
|                         | West Azarbayejan:Uromieh, Salmas to Pereshkhoran  | 2450 | <b>98075</b>                         | Bagheri             | LT622472             | KY071158 |
|                         | West Azarbayejan:Khoy, Ghotour, Razi              | 2170 | <b>98393</b>                         | Maassoumi & Bagheri | LT622473             | -        |
|                         | Turkey: Van                                       | 1900 | <b>2589</b><br><b>2590</b>           | Karaman             | LT622467<br>LT622468 | -<br>-   |
|                         | Turkey: Van                                       | 2550 | <b>2626</b>                          | Karaman             | LT622469             | -        |
|                         | Turkey: Van                                       | 2500 | <b>728</b><br>(M)                    | Rix et. al.         | LT622470             | -        |
|                         | Turkey: Gevas                                     | 2200 | <b>787-93-11</b><br>(MSB)            | Ehrendorfer Sorger  | LT622471             | -        |
| <i>A. lagopoides</i>    | East Azarbayejan:Tabriz, Kandovan, Sahand Mt.     | 2850 | <b>98042</b>                         | Bagheri             | LT622474             | -        |
|                         | East Azarbayejan:Sofian to Shabestar, Kamar sefid | 2300 | <b>98305</b>                         | Maassoumi & Bagheri | LT622475             | -        |
| <i>A. laguriformis</i>  | Kermanshah: Bistun                                | 1800 | <b>1096</b>                          | Hamzehee & Hatami   | KP658435.1           | -        |
|                         | Iraq: Sefin Mt.                                   | 1000 | <b>1194</b><br>(B)(Iso)              | Bornmüller          | KP658433.1           | KY071159 |
| <i>A. laxispicatus</i>  | Hamedan: Boghati Mt.                              | 2000 | <b>280</b><br>(W)<br>W.N. 2009-15399 | Ghahreman inejad    | LT622483             | -        |
|                         | Hamedan:Hamedan to Avaj                           | 2100 | <b>97914</b>                         | Bagheri             | LT622484             | -        |

| Sp.                    | Loc.                                     | Alt. | No.                                 | Coll.                  | ITS      | ycf1     |
|------------------------|------------------------------------------|------|-------------------------------------|------------------------|----------|----------|
| <i>A. lagurus</i>      | Turkey: Bitlis                           | 2400 | <b>109</b><br>(MSB)                 | Engel                  | LT622476 | -        |
|                        | Turkey: Ozlap                            | 2100 | <b>2761</b>                         | Karaman                | LT622477 | -        |
|                        | Caucasus                                 | -    | <b>276</b><br>(B)                   | -                      | LT622478 | -        |
|                        | Turkey: Van                              | 1800 | <b>2802</b>                         | Mehmet                 | LT622479 | -        |
|                        | Turkey: Van                              | -    | <b>5505</b>                         | Mehmet                 | LT622480 | -        |
|                        | East Azarbayejan:Jolfa, Zonouz           | 2300 | <b>98321</b>                        | Maassoumi<br>& Bagheri | LT622481 | -        |
|                        | West Azarbayejan:Khoy, Ghotour, Razi     | 2170 | <b>98395</b>                        | Maassoumi<br>& Bagheri | LT622482 | -        |
| <i>A. leptynticus</i>  | Semnan: Firuzkuh                         | 2450 | <b>13014</b><br>(Holo)              | Wendelbo<br>& Foroughi | LT622485 | KY071160 |
|                        | Semnan: Shahmirzad to Foladmahaleh       | 2300 | <b>97906</b>                        | Bagheri                | LT622487 | -        |
|                        | Semnan: Semnan to Firuzkuh               | 2400 | <b>97909</b>                        | Bagheri                | LT622488 | -        |
|                        | Zanjan: Zanjan to Dandi, Morassa village | 2250 | <b>99842</b>                        | Mahmoodi               | LT622489 | -        |
|                        | Zanjan: Dandi to Tekab                   | 2300 | <b>9005</b>                         | Bagheri                | LT622486 | -        |
| <i>A. leucargyreus</i> | Hamedan: Elwend Mt.                      | -    | <b>s.n.</b> (B-13)<br>(B)<br>(Holo) | Strauss                | LT622492 | -        |
|                        | Hamedan: Elwend Mt.                      | 3100 | <b>4501</b>                         | Ariavand               | LT622490 | -        |
|                        | Hamedan: Tuyserkan, Elvend Mt.           | 3300 | <b>95790</b>                        | Dehshiri&<br>Mostafavi | LT622491 | KY071161 |

| Sp.                     | Loc.                                              | Alt. | No.                                             | Coll.                    | ITS                  | ycf<br>1      |
|-------------------------|---------------------------------------------------|------|-------------------------------------------------|--------------------------|----------------------|---------------|
| <i>A. makuensis</i>     | West Azarbayejan: Maku, Chaldoran to Khoy         | 2150 | <b>98385</b><br><b>98387</b>                    | Maassoumi<br>& Bagheri   | LT622493<br>LT622494 | KY071162<br>- |
| <i>A. marivanensis</i>  | Kurdestan:Sardasht to Mahabad, Marivan            | 1400 | <b>80658</b>                                    | Maassoumi<br>&Shahsavari | LT622497             | -             |
|                         | Kurdestan:Baneh to Marivan                        | 1650 | <b>29326</b><br><b>(Holo)</b>                   | Runemark,<br>Mozaffarian | LT622496             | KY071163      |
|                         | Iraq: Sefin Mt.                                   | 1200 | <b>1177</b><br><b>(B)</b>                       | Bornmüller               | LT622495             | -             |
|                         | Kurdestan                                         | -    | <b>98445</b>                                    | Maassoumi<br>& Bagheri   | LT622498             | -             |
| <i>A. melanostictus</i> | West Azarbayejan:Oshnavyeh to Uromieh,<br>Gnjabad | 1900 | <b>101438</b>                                   | Bagheri                  | LT622499             | -             |
|                         | Khorasan: Ghuchan, Alamali neck                   | 2000 | <b>10375</b>                                    | Mousavi &<br>Pariyab     | LT622501             | -             |
|                         | Zanjan: Mianeh                                    | 1800 | <b>6758</b>                                     | Bagheri                  | LT622506             | -             |
|                         | Kurdestan: Sanandaj, Salavatabad                  | 2200 | <b>101442</b>                                   | Bagheri                  | LT622500             | -             |
|                         | West Azarbayejan: Rezaeiye                        | 1600 | <b>36816</b><br><b>(W)</b><br>1979- 00978       | Mosavi &<br>Tehrani      | LT622504             | -             |
|                         | Hamadan: Malayer, Ekbatan Dam                     | -    | <b>52092</b>                                    | Maassoumi                | LT622505             | KY071164      |
|                         | Soltanabad                                        | -    | <b>s.n. (145)</b><br><b>(B)</b><br><b>(Iso)</b> | Strauss                  | LT622503             | -             |
|                         | Iraq: Sefin Mt.                                   | 1200 | <b>1177-b</b><br><b>(B)</b>                     | Bornmüller               | LT622502             | -             |
|                         | Zanjan: Mahneshan                                 | 2100 | <b>6784</b>                                     | Bagheri                  | LT622507             | -             |
|                         | Zanjan: Gheydar, Karasf                           | -    | <b>8991</b>                                     | Bagheri                  | LT622508             | -             |

| Sp.                                           | Loc.                                               | Alt. | No.                                    | Coll.                           | ITS                              | ycf1        |
|-----------------------------------------------|----------------------------------------------------|------|----------------------------------------|---------------------------------|----------------------------------|-------------|
| <i>A. mesopotamicus</i>                       | Mesopotamia                                        | -    | <b>1275</b><br>(MSB)<br>(Holo)         | Aucher-Eloy                     | LT622509                         | -           |
| <i>A. montis nacarouzii</i>                   | Kurdestan:Saghez to Baneh, Pir omran, Nacarouz Mt. | 2500 | <b>7219</b><br>(Holo)                  | Maroofi & Moradi                | LT622510                         | KY071165    |
| <i>A. montis sarali</i>                       | Kurdestan: Sanandaj, Chehelcheshme Mt., Saral      | 2350 | <b>74926</b>                           | Mozaffarian, Maassoumi & Safavi | LT622511                         | -           |
| <i>A. mostafa-assadii</i>                     | Zanjan: Abhar to Gheydar                           | 2300 | <b>101444</b><br><b>101447</b><br>s.n. | Bagheri                         | LT622512<br>LT622514<br>LT622518 | -<br>-<br>- |
|                                               | Zanjan: Abhar to Gheydar                           | -    | <b>101445</b>                          | Bagheri                         | LT622513                         | -           |
|                                               | Zanjan: Abhar to Gheydar                           | 1940 | <b>6598</b><br><b>6628</b>             | Bagheri                         | LT622515<br>LT622516             | -<br>-      |
|                                               | Zanjan: Zanjan to Bijar                            | 2070 | <b>6884</b>                            | Bagheri                         | LT622517                         | -           |
|                                               |                                                    |      |                                        |                                 |                                  |             |
| <i>A. murinus</i><br>( <i>Anthylloiedei</i> ) | Chaharmahal: Dena,from bideh,bijan pass            | 3000 | <b>76750</b>                           | Maassoumi & Mozaffarian         | LT622519                         | KY071166    |
| <i>A. naftabensis</i>                         | Mazandaran: Baladeh to Pole Zanguleh               | 3110 | <b>98566</b><br><b>98567</b>           | Bagheri                         | LT622522<br>LT622523             | -<br>-      |
|                                               | Mazandaran: Nur, Naftab                            | 3200 | <b>6465</b><br>(B)<br>(Holo)           | Rechinger                       | LT622521                         | -           |
|                                               | Mazazndaran: Nur, Elika                            | 3000 | <b>6410</b><br>(B)<br>(Holo)           | Rechinger & Manucheri           | LT622520                         | -           |

| Sp.                       | Loc.                            | Alt. | No.                       | Coll.                | ITS                  | ye/f          |
|---------------------------|---------------------------------|------|---------------------------|----------------------|----------------------|---------------|
| <i>A. nervistipulus</i>   | Kurdestan: Sanandaj to Kamyaran | 2030 | <b>86020</b>              | Maassoumi&<br>Safavi | LT622527             | -             |
|                           | Kurdestan: Kamyaran to Sanandaj | 1450 | <b>35264<br/>(B)</b>      | Zarre et al.         | LT622525             | -             |
|                           | Siwend                          | -    | <b>333<br/>(Holo) (B)</b> | Stapf                | LT622524             | -             |
|                           | Kurdestan: Sanandaj to Marivan  | 1800 | <b>42914<br/>(B)</b>      | Rechinger            | LT622526             | -             |
| <i>A. nirensis</i>        | Ardabil: Ardabil to Nir         | 2250 | <b>97976<br/>97977</b>    | Bagheri              | LT622528<br>LT622529 | KY071167<br>- |
| <i>A. nowjianensis</i>    | Lorestan: Nozhian               | -    | <b>12088</b>              | Gholmrezaei          | LT622530             | -             |
| <i>A. paralurges</i>      | Zanjan: Gheydar, Gheydar Mt.    | 2300 | <b>7032</b>               | Bagheri              | LT622534             | -             |
|                           | Zanjan: Gheydar, Karasf Mt.     | 1930 | <b>6646</b>               | Bagheri              | LT622533             | -             |
|                           | Zanjan: Abhar to Gheydar        | 2300 | <b>101448<br/>101449</b>  | Bagheri              | LT622531<br>LT622532 | -<br>KY071168 |
| <i>A. paralurgiformis</i> | Zanjan: Abhar to Gheydar        | 2300 | <b>101446</b>             | Bagheri              | LT622535             | -             |
|                           | Zanjan: Dehjalal                | 2060 | <b>6855</b>               | Bagheri              | LT622536             | -             |
|                           | Zanjan: Gheydar, Gheydar Mt.    | 2300 | <b>8829</b>               | Bagheri              | LT622537             | -             |

| Sp.                        | Loc.                                              | Alt. | No.                           | Coll.                           | ITS                  | ycf1     |
|----------------------------|---------------------------------------------------|------|-------------------------------|---------------------------------|----------------------|----------|
| <i>A. pauxillis</i>        | Zanjan: Mahneshan to Dandi, Anguran, Belgheis Mt. | 2200 | <b>64818 (Holo)</b>           | Maassoumi                       | LT622538             | KY071169 |
|                            | Zanjan: Soltanieh, Arjin, Sheikhsari              | 2100 | <b>60604</b>                  | Ranjbar, Gharemani-Nejad, Zarre | LT622539             | -        |
|                            | Zanjan: Gheydar, Gheydar Mt.                      | 2100 | <b>9072</b>                   | Bagheri                         | LT622540             | -        |
| <i>A. pediculariformis</i> | Zanjan: Soltanieh, Arjin, Sheikhsari              | 2250 | <b>69603 (Holo)</b>           | Ranjbar, Ghahremani & Zarre     | LT622543             | KY071170 |
|                            | Zanjan: Gheydar, Gheydar Mt.                      | 2300 | <b>14 9800</b>                | Bagheri                         | LT622541<br>LT622545 | -<br>-   |
|                            | Zanjan: Gheydar, Gheydar Mt.                      | -    | <b>6858</b>                   | Bagheri                         | LT622542             | -        |
|                            | Zanjan: Gheydar, Yengi kand                       | 2055 | <b>8858</b>                   | Bagheri                         | LT622544             | -        |
| <i>A. persicus</i>         | Arak: Arak to Malayer                             | 2100 | <b>48080</b>                  | Mozzafarian Mohammadi           | LT622555             | KY071171 |
|                            | Lorestan: Borujerd                                | 2200 | <b>1268 (B)</b>               | Køie                            | LT622554             | -        |
| <i>A. pluriflorus</i>      | Zanjan: Mahneshan to Pari                         | 2300 | <b>6812a (Holo)<br/>6812b</b> | Bagheri                         | LT622556             | -        |
|                            |                                                   |      |                               |                                 | LT622557             | -        |
| <i>A. pseudoparaluges</i>  | Zanjan: Gheydar, Yengi kand                       | 2050 | <b>8865</b>                   | Bagheri                         | LT622558             | -        |

| Sp.                         | Loc.                                               | Alt. | No.                                             | Coll.                                  | ITS      | ycf1     |
|-----------------------------|----------------------------------------------------|------|-------------------------------------------------|----------------------------------------|----------|----------|
| <i>A. pereshkhoranicus</i>  | West Azarbayejan: Silvana, Mavana, Bardarash       | 3000 | <b>69902</b><br><b>(69602)</b><br><b>(Holo)</b> | Mozaffarian                            | LT622550 | -        |
|                             | West Azarbayejan: Silvana, Mavana                  | 1500 | <b>101437</b>                                   | Rahiminejad<br>& Bagheri               | LT622546 | -        |
|                             | West Azarbayejan: Uromiyeh, Targavar               | 2100 | <b>69605</b>                                    | Ranjbar,<br>Gharemani-<br>Nejad, Zarre | LT622549 | -        |
|                             | West Azarbayejan: Silvana to Salmas                | 1600 | <b>85185</b>                                    | Assadi                                 | LT622551 | -        |
|                             | West Azarbayejan: Razhan, Khalil kuh               | 3200 | <b>48846-a</b><br><b>(B)</b><br><b>(Holo)</b>   | Rechinger                              | LT622548 | -        |
|                             | West Azarbayejan: Khalil kuh                       | 2400 | <b>48659</b><br><b>(B)</b>                      | Rechinger                              | LT622547 | -        |
|                             | West Azarbayejan: Salmas, Serrow                   | 1840 | <b>98430</b>                                    | Maassoumi<br>& Bagheri                 | LT622553 | -        |
|                             | West Azarbayejan: Maku, Chaldoran to<br>Gharakhach | 2300 | <b>98362</b>                                    | Maassoumi<br>& Bagheri                 | LT622552 | -        |
| <i>A. pseudopersicus</i>    | East Azarbayejan: Tabriz to Sperkhan               | 1600 | <b>69853</b><br><b>(Holo)</b>                   | Mozzafarian                            | LT622560 | KY071172 |
|                             | East Azarbayejan: Sperkhan, Sahand Mt.             | 2850 | <b>37535</b><br><b>(MSB)</b>                    | Mozzafarian<br>Mohammadi               | LT622559 | -        |
| <i>A. purpureocalycinus</i> | Turkey: Van                                        | -    | <b>s.n.</b>                                     | Mehmet                                 | LT622563 | -        |
|                             | Turkey: Gurpinar                                   | 2200 | <b>2603</b>                                     | Karaman                                | LT622561 | -        |
|                             | Turkey: Van                                        | 2000 | <b>4880</b>                                     | Altan                                  | LT622562 | -        |

| Sp.                       | Loc.                                            | Alt. | No.                                      | Coll.                 | ITS                      | ycf1     |
|---------------------------|-------------------------------------------------|------|------------------------------------------|-----------------------|--------------------------|----------|
| <i>A. qorvehensis</i>     | Hamedan: Qorveh, Veynesar                       | 1900 | <b>82602</b><br>(MSB)<br>(Holo)          | Maassoumi & Safavi    | LT622565                 | KY071173 |
|                           | Hamedan:Hamedan to Ghorveh, Veynesar            | 2000 | <b>97928</b>                             | Bagheri               | LT622566                 | -        |
|                           | Zanjan: Soltanieh                               | 1850 | <b>40920</b><br>(W)                      | Termeh & Moussavi     | LT622564                 | -        |
| <i>A. qoturensis</i>      | West Azarbayejan: Khani ziarat, Habashi, Ghotur | 3000 | <b>49644</b><br>(M)<br>(Holo)            | Rechinger & Renz      | LT622568                 | KY071174 |
|                           | West Azarbayejan: Ghotur, Abgarm                | 1900 | <b>7330</b>                              | Amini                 | LT622569                 | -        |
|                           | Turkey: Van                                     | 2750 | <b>2653</b>                              | Karaman               | LT622567                 | -        |
| <i>A. qeydarnabiensis</i> | Zanjan: Gheydar, Gheydar Mt.                    | 2330 | <b>8801</b><br>(Holo)                    | Bagheri               | LT622570                 | KY071175 |
|                           | Zanjan: Gheydar, Gheydar Mt.                    | 2300 | <b>98253</b>                             | Bagheri               | LT622571                 | -        |
| <i>A. recognitus</i>      | East Azarbayejan:Tabriz toBostanabad, Tikmedash | 1900 | <b>97997</b>                             | Bagheri               | LT622574                 | KY071176 |
|                           | Ardebil: Meresht to Arpachai                    | 2500 | <b>34304</b>                             | Mozaffarian & Nowrozi | LT622572                 |          |
|                           | East Azarbayejan: Arpa Chai                     | 2400 | <b>55369</b><br>(MSB)                    | Podlech et al.        | LT622573                 |          |
| <i>A. remotispicatus</i>  | Zanjan: Gheydar, Zarand, Zarand Mt.             | 2300 | <b>97932a</b><br>(Holo)<br><b>97932b</b> | Bagheri               | KT997427.1<br>KT997428.1 | -<br>-   |
| <i>A. rijabensis</i>      | Kermanshah: Eslam abad, Kerend                  | -    | <b>101773</b><br>(Holo)                  | Mozafarian            | LT622575                 | -        |

| Sp.                        | Loc.                                 | Alt. | No.                                   | Coll.            | ITS                  | ycf1     |
|----------------------------|--------------------------------------|------|---------------------------------------|------------------|----------------------|----------|
| <i>A. rubriflorus</i>      | Mazandaran                           | 1900 | <b>75446</b>                          | -                | LT622577             | KY071177 |
|                            | Mazandaran: Kandovan                 | 3000 | <b>69623B</b>                         | Ghahremani-Nejad | LT622576             | -        |
|                            | Mazandaran: Janat Rudbar             | 3100 | <b>78446</b>                          | Maassoumi        | LT622578             | -        |
| <i>A. rubrostriatus</i>    | Zanjan: Gheydar, Gheydar Mt.         | 2300 | <b>98252<br/>7114</b>                 | Bagheri          | LT622585<br>LT622584 | -<br>-   |
|                            | Zanjan: Abhar to Gheydar             | 2000 | <b>101443</b>                         | Bagheri          | LT622580             | KY071178 |
|                            | Alborz: Gasawand Mt.                 | -    | <b>s.n. (B-12)<br/>(B)<br/>(Holo)</b> | Strauss          | LT622579             | -        |
|                            | Zanjan: Sohrein                      | 2080 | <b>6873</b>                           | Bagheri          | LT622582             | -        |
|                            | Tehran: Damavand                     | 1700 | <b>21256<br/>(MSB)</b>                | Attar & Okhovvat | LT622581             | -        |
|                            | Zanjan: Zanjan to Tarom              | 2250 | <b>6844</b>                           | Bagheri          | LT622583             | -        |
| <i>A. salavatabadensis</i> | Kurdestan: Salavatabad               | 2300 | <b>48473<br/>(M)<br/>(Holo)</b>       | Rechinger        | LT622589             | KY071179 |
|                            | Hamedan:Hamedan to Ghorveh, Veynesar | 2000 | <b>101440</b>                         | Bagheri          | LT622586             | -        |
|                            | Kurdestan: Sanandaj                  | 2000 | <b>42753<br/>(MSB)</b>                | Rechinger        | LT622587             | -        |
|                            | Kurdestan: Salvatabad                | 2300 | <b>42811<br/>(B)</b>                  | Rechinger        | LT622588             | -        |
|                            | Kurdestan: Sanandaj                  | 2000 | <b>84854</b>                          | -                | LT622590             | KY071180 |

| Sp.                      | Loc.                                                     | Alt. | No.                             | Coll.               | ITS                  | ycf1     |
|--------------------------|----------------------------------------------------------|------|---------------------------------|---------------------|----------------------|----------|
| <i>A. sciureus</i>       | Qazvin:Alamut, Moallem Kelayeh, Ghostinlar neck          | 1800 | <b>97946</b>                    | Bagheri             | KT894781.1           | KY071181 |
|                          | Alborz: Karaj                                            | 2000 | <b>19326</b>                    | Amin & Bazargan     | KT894780.1           | -        |
|                          | Alborz: Elborz Mt.                                       | -    | <b>520<br/>(MSB)<br/>(Iso)</b>  | Kotschy             | KT894782.1           | -        |
| <i>A. seidabadensis</i>  | East Azarbayejan: Sarab to Nir, Bozghosh Mt.             | 2500 | <b>98014<br/>98018</b>          | Bagheri             | LT622592<br>LT622593 | -<br>-   |
|                          | East Azarbayejan: Sarab to Nir, Soltanabad, Bozghosh Mt. | 2150 | <b>98011</b>                    | Bagheri             | LT622591             | -        |
|                          | East Azarbayejan: Bostanabad, Saeidabad                  | 1800 | <b>98295</b>                    | Maassoumi & Bagheri | LT622594             | KY071182 |
|                          | East Azarbayejan: Tabriz, Seidabbad                      | -    | <b>s.n.<br/>(MSB)<br/>(Iso)</b> | Bunge & Bienert     | LT622595             | -        |
| <i>A. simakanensis</i>   | Fars: Bavanat                                            | 2500 | <b>s.n.<br/>(Holo)</b>          | Teyebi Khorrami     | LT622597             | KY071183 |
|                          | Chaharmahal va Bakhtiari: Vardanja                       | 2300 | <b>98204</b>                    | Bagheri             | LT622596             | -        |
| <i>A. sohrevardianus</i> | Zanjan: Gheydar, Karasf to Sohrevard                     | 2120 | <b>8846</b>                     | Bagheri             | LT622598             | -        |
| <i>A. sphericus</i>      | West Azarbayejan: Uromieh, Salmas to Kozarash            | 2250 | <b>98061</b>                    | Bagheri             | LT622603             | -        |

| Sp.                              | Loc.                                        | Alt. | No.                     | Coll.               | ITS                  | ycf1          |
|----------------------------------|---------------------------------------------|------|-------------------------|---------------------|----------------------|---------------|
| <i>A. sosnowskyi</i>             | West Azarbayejan:Chaldoran to Khoy, Makhmur | 2050 | <b>98391</b>            | Maassoumi & Bagheri | LT622601             | -             |
|                                  | West Azarbayejan: Maku                      | 1860 | <b>82567</b>            | Maassoumi & Safavi  | LT622600             | KY071184      |
|                                  | Turkey:Erzurum                              | 2000 | <b>46632 (MSB)</b>      | Nydegger            | LT622599             | -             |
|                                  | Georgia: Tana                               | -    | <b>s.n. (MSB) (Iso)</b> | Kikodzes            | LT622602             | -             |
| <i>A. straussii</i>              | Hamedan:Hamedan to Avaj                     | 2200 | <b>97917 97918</b>      | Bagheri             | LT622606<br>LT622607 | KY071185<br>- |
|                                  | Hamedan:Hamedan to Ghahavand                | 2350 | <b>64468</b>            | Mozaffarian         | LT622604             | -             |
|                                  | Hamedan:Hamadan to Saveh                    | 1900 | <b>65029 (MSB)</b>      | Mozaffarian         | LT622605             | -             |
| <i>A. subkohrudicus</i>          | Zanjan: Gheydar, Gheydar Mt.                | 2090 | <b>8812 (Holo)</b>      | Bagheri             | LT622608             | KY071186      |
| <i>A. sublaguriformis</i>        | Zanjan: Zanjan to Mahneshan                 | 2120 | <b>8952</b>             | Bagheri             | LT622609             | -             |
|                                  | Zanjan: Zanjan to Mahneshan                 | 2120 | <b>8953 (Holo)</b>      | Bagheri             | LT622610             | -             |
| <i>A. submitis (Anthyloiedi)</i> | Ghazvin: Evan, Khashe chal                  | 3100 | <b>75886</b>            | Jamzad et al.       | LT622611             | KY071187      |
| <i>A. subrecognitus</i>          | Zanjan: Mahneshan to Pari                   | 2300 | <b>8960 98279</b>       | Bagheri             | LT622615<br>LT622616 | KY071188<br>- |
|                                  | Zanjan: Mahneshan to Pari                   | 2300 | <b>6808 6811</b>        | Bagheri             | LT622613<br>LT622614 | -<br>-        |
|                                  | Zanjan: Mahneshan, Damirlo Mt.              | 2739 | <b>100334-B</b>         | Mahmoodi            | LT622612             | -             |

| Sp.                                  | Loc.                                               | Alt. | No.                                 | Coll.                            | ITS        | ycf1     |
|--------------------------------------|----------------------------------------------------|------|-------------------------------------|----------------------------------|------------|----------|
| <i>A. tabrizianus</i>                | East Azarbayejan:Sofian to Shabestar, Kamar sefid  | 1570 | <b>98302</b>                        | Maassoumi & Bagheri              | LT622622   | KY071189 |
|                                      | East Azarbayejan:Tabriz, Kandovan, Sahand Mt.      | 2850 | <b>98044</b>                        | Bagheri                          | LT622619   | -        |
|                                      | East Azarbayejan:Bostanabad to Tabriz, Shibli neck | 2100 | <b>98050</b>                        | Bagheri                          | LT622620   | -        |
|                                      | East Azarbayejan:Bostanabad to Tabriz, Saeid abad  | -    | <b>69614</b>                        | Ranjbar, Ghahremani-Nejad& Zarre | LT622618   | -        |
|                                      | West Azarbayejan: Bukan to Mahabad                 | 1650 | <b>101439</b>                       | Bagheri                          | LT622617   | -        |
|                                      | East Azarbayejan:Sofian to Shabestar, Kamar sefid  | 2300 | <b>98301</b>                        | Maassoumi & Bagheri              | LT622621   | -        |
| <i>A. tricholobus (Campylanthus)</i> | Zanjan: Zanjan to Dandi, Kaltakeh village          | 1900 | <b>99583</b>                        | Mahmodi                          | LT622623   | -        |
| <i>A. trifoliasstrum</i>             | Turkey: Gurpinar                                   | 2150 | <b>2650</b>                         | Karaman                          | LT622624   | -        |
|                                      | Turkey: Van                                        | 1850 | <b>44283 (W)</b><br>1985- 10183     | Davis                            | KP658434.1 | KY071190 |
| <i>A. uraniolimneus</i>              | East Azarbayejan:Jolfa, Zonouz                     | 2300 | <b>98350</b>                        | Maassoumi & Bagheri              | LT622627   | KY071191 |
|                                      | West Azarbayjan: Silvana, Mavana                   | 2800 | <b>69901</b>                        | Mozaffarian                      | LT622626   | -        |
|                                      | Caucasus: Pambakaski                               | 2200 | <b>s.n. (W)</b><br>W. N. 1983-10642 | Valak                            | LT622625   | -        |

| Sp.                         | Loc.                                   | Alt. | No.                      | Coll.               | ITS                  | ycf1     |
|-----------------------------|----------------------------------------|------|--------------------------|---------------------|----------------------|----------|
| <i>A. vaginans</i>          | Turkey: Van                            | -    | <b>4432</b>              | Mehmet              | LT622629             | -        |
|                             | Turkey: Goksun                         | 540  | <b>42588 (MSB)</b>       | Nydegger            | LT622628             | KY071192 |
| <i>A. velenovskyi</i>       | East Azarbayejan: Kandovan, Sahand Mt. | 2900 | <b>18283 (W)</b>         | Grant               | LT622630             | -        |
| <i>A. vernaculus</i>        | Isfahan: Najafabad to Khorramabad      | -    | <b>1010 (MSB) (Holo)</b> | Manuchehri          | LT622631             | KY071193 |
|                             | Isfahan: Chadegan to Tiran             | 2430 | <b>98205 98207</b>       | Bagheri             | LT622632<br>LT622633 | -<br>-   |
| <i>A. woronowii</i>         | Turkey: Batum                          | 2200 | <b>5946 (B) (Holo)</b>   | Woronow             | LT622634             | -        |
|                             | West Azarbayejan: Salmas, Pereshkhoran | 2100 | <b>69939</b>             | Mozaffarian         | LT622635             | -        |
|                             | East Azarbayejan:Jolfa, Zonouz         | 2300 | <b>98331</b>             | Maassoumi & Bagheri | LT622636             | -        |
| <i>A. zohrabi</i>           | West Azarbayejan:Maku to Chaldoran     | 1750 | <b>98367</b>             | Maassoumi & Bagheri | LT622638             | -        |
|                             | Turkey: Armenia prope Baibut           | -    | <b>69 (MSB) (Iso)</b>    | Bourgeau            | LT622637             | -        |
| <i>Biserrula pelecinus</i>  | Australia                              | -    | -                        | -                   | AB287409.1           | -        |
| <i>Oxytropis kotschyana</i> | Ghazvin: Moalem kelaye                 | 1900 | <b>98085</b>             | Bagheri             | LT622640             | -        |

| Sp.                        | Loc.                                     | Alt. | No.                                      | Coll.    | ITS        | ycf1       |
|----------------------------|------------------------------------------|------|------------------------------------------|----------|------------|------------|
| <i>Oxytropis karjagini</i> | Zanjan: Zanjan to Dandi, Talkhab village | 2300 | 99612                                    | Mahmoodi | LT622639   | -          |
| <i>Oxytropis pilosa</i>    | Romania                                  | -    | 662398<br>(without<br>herbarium<br>name) | Bartha   | -          | JQ801550.1 |
|                            | USSR                                     | -    | -                                        | -        | AF121759.1 | -          |

**Table S2** PCR primers used for the amplification of the *ycf1* region of the chloroplast genome in *Astragalus* sect. *Hymnostegis* and graphical representation of their position in the gene. Relative primer positions are given in the graph below.

| Primer name  | Primer sequence (5'-3') | Reference               |
|--------------|-------------------------|-------------------------|
| ycf1-F       | ATCMATGGACAARTTGGTT     | Bartha et al. 2012 (64) |
| ycf1-R       | CTAATCGATAATTTGGCC      | Bartha et al. 2012 (64) |
| IntF1        | AAAGGAGCAAACGAAGAAGC    | Bartha et al. 2012 (64) |
| IntR         | TCGTTGAGGTAGTTATTTTCG   | Bartha et al. 2012 (64) |
| ycf1_Int_SF  | ATATCTATCTCGCTTAAACC    | this study              |
| ycf1_Int_SRB | TGGTACAAGCCAAGGATTC     | this study              |
| ycf1_int_SRC | CCTTTAGATCGTTGAGGTAG    | this study              |

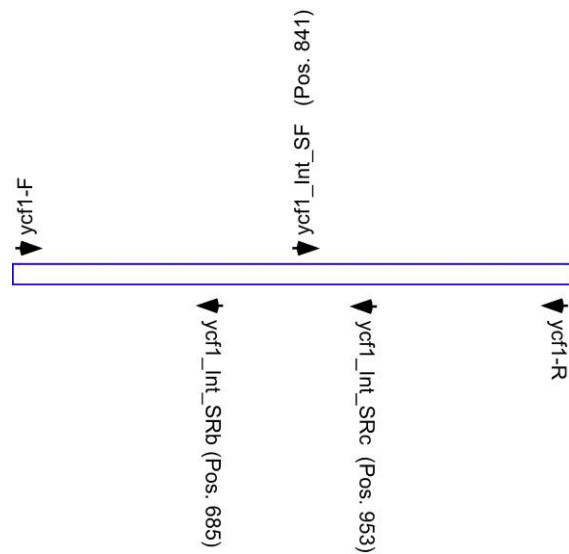

**Table S3** Results of age estimations in a BEAST analysis. Taxon group refers to the tree in Figure S3.

| Taxon group                   | Node support<br>Yule | Dates Yule (in My) |           | Calibration point                       |
|-------------------------------|----------------------|--------------------|-----------|-----------------------------------------|
|                               |                      | mean age           | 95% HPD   |                                         |
| hymeno                        | 0.96                 | 3.55               | 2.13-5.08 |                                         |
| angus                         | 1                    | 0.96               | 0.06-2.19 |                                         |
| brado                         | 1                    | 0.72               | 0.12-1.46 |                                         |
| chehr                         | 0.97                 | 1.42               | 0.45-2.51 |                                         |
| laxi                          | 0.97                 | 0.26               | 0-0.78    |                                         |
| atro                          | 0.9                  | 0.61               | 0.05-1.34 |                                         |
| austro                        | 0.91                 | 0.99               | 0.3-1.81  |                                         |
| vagi                          | 0.8                  | 2.31               | 1.18-3.59 |                                         |
| dianat                        | 1                    | 1                  | 0.3-1.96  |                                         |
| hymeno+outgroup1              | 1                    | 3.96               | 2.41-5.59 |                                         |
| callis                        | 1                    | 0.25               | 0.01-0.6  |                                         |
| glauc+callis                  | 0.99                 | 1.58               | 0.67-2.64 |                                         |
| fasc+leuc                     | 0.98                 | 1.74               | 0.7-2.85  |                                         |
| outgroup1                     | 0.99                 | 2.64               | 1.44-4.02 |                                         |
| hymeno+outgroup1+aste         | 1                    | 5.29               | 3.33-7.34 |                                         |
| annu+epi                      | 1                    | 2.97               | 1.52-4.61 |                                         |
| biser+annu                    | 1                    | 5.55               | 3.32-7.91 |                                         |
| <i>Oxytropis</i>              | 1                    | 1.27               | 0.25-2.62 |                                         |
| <i>Astragalus + Biserrula</i> |                      |                    |           | calibrated–Normal<br>(12.4. $\pm$ 1.45) |

Strict consensus tree

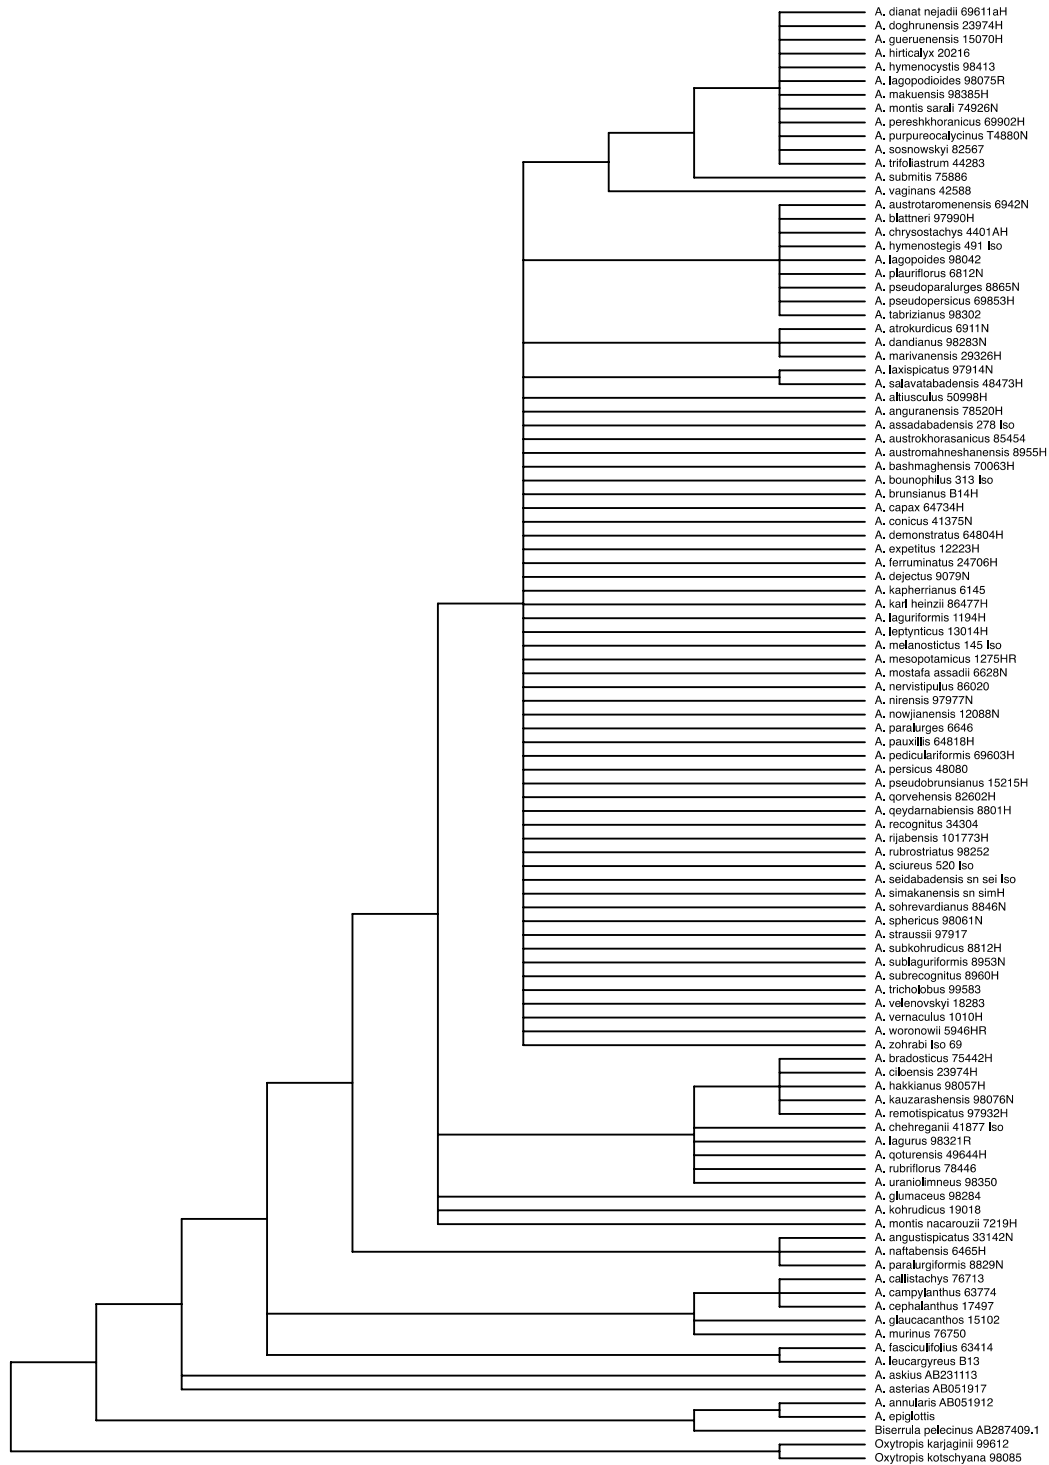

**Figure S1.** Strict consensus of 359 maximum parsimony trees derived from nrDNA ITS sequences of a dataset including one individual each per sect. *Hymenostegis* species.

**Figure S2.** Phylogenetic tree derived from a maximum-likelihood reconstruction in RAXML (GTRGAMMA) based on a nrDNA ITS dataset of 106 *Astragalus* and outgroup individuals. Numbers along branches give bootstrap support values  $\geq 50\%$ .

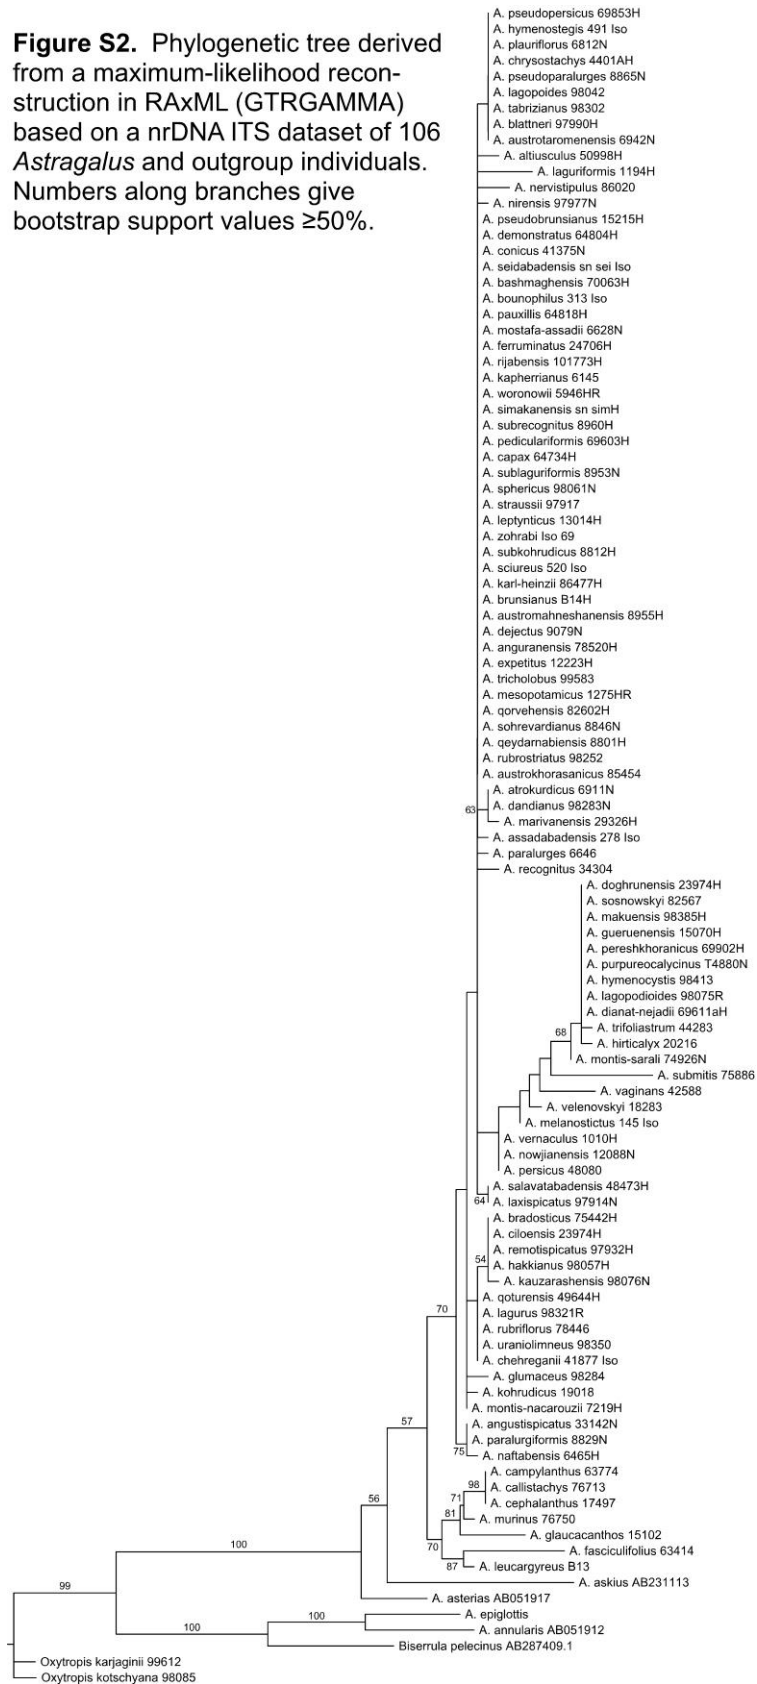

**Figure S3.** Phylogenetic tree derived from Bayesian inference of a nrDNA ITS dataset of 303 *Astragalus* and outgroup individuals. Numbers along branches give posterior probabilities. Asterisks behind species names indicate new species names currently in the process of valid publication, ° depicts three species formerly not included in sect. *Hymenostegis*.

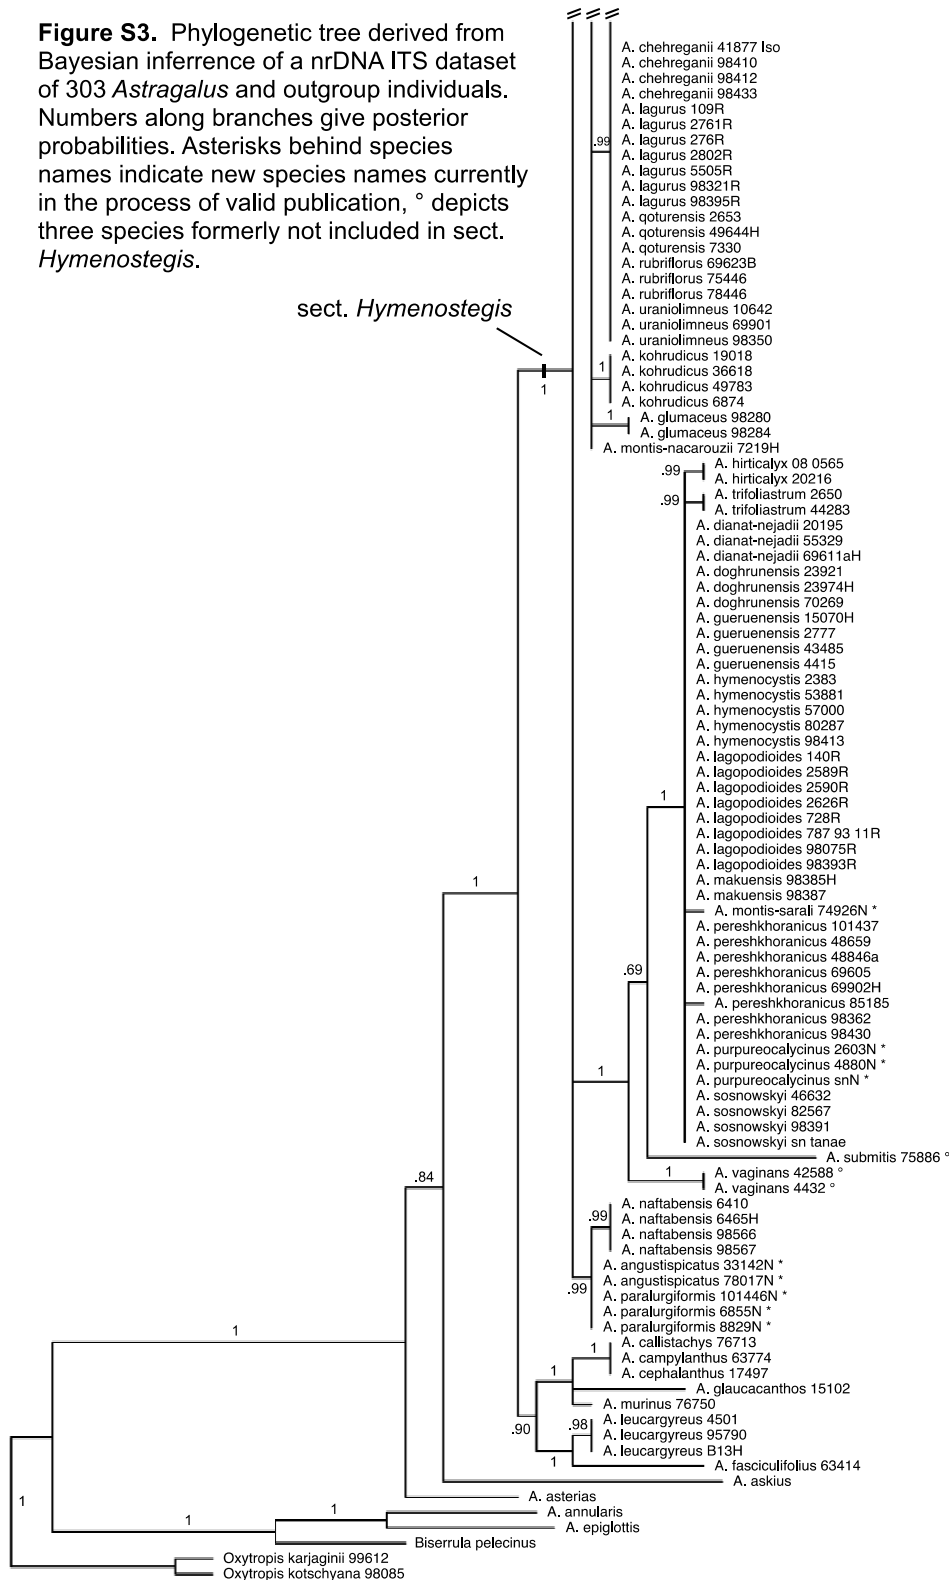

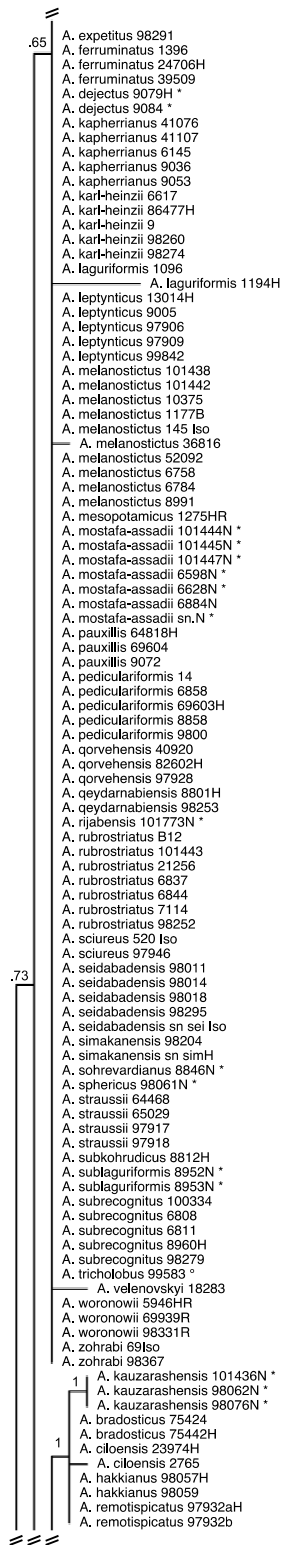

Figure S3. Continued.



**Figure S4.** Maximum-likelihood tree derived from the combined sequences of ITS and *ycf1*. Numbers along branches provide support values derived from 500 bootstrap re-samples.

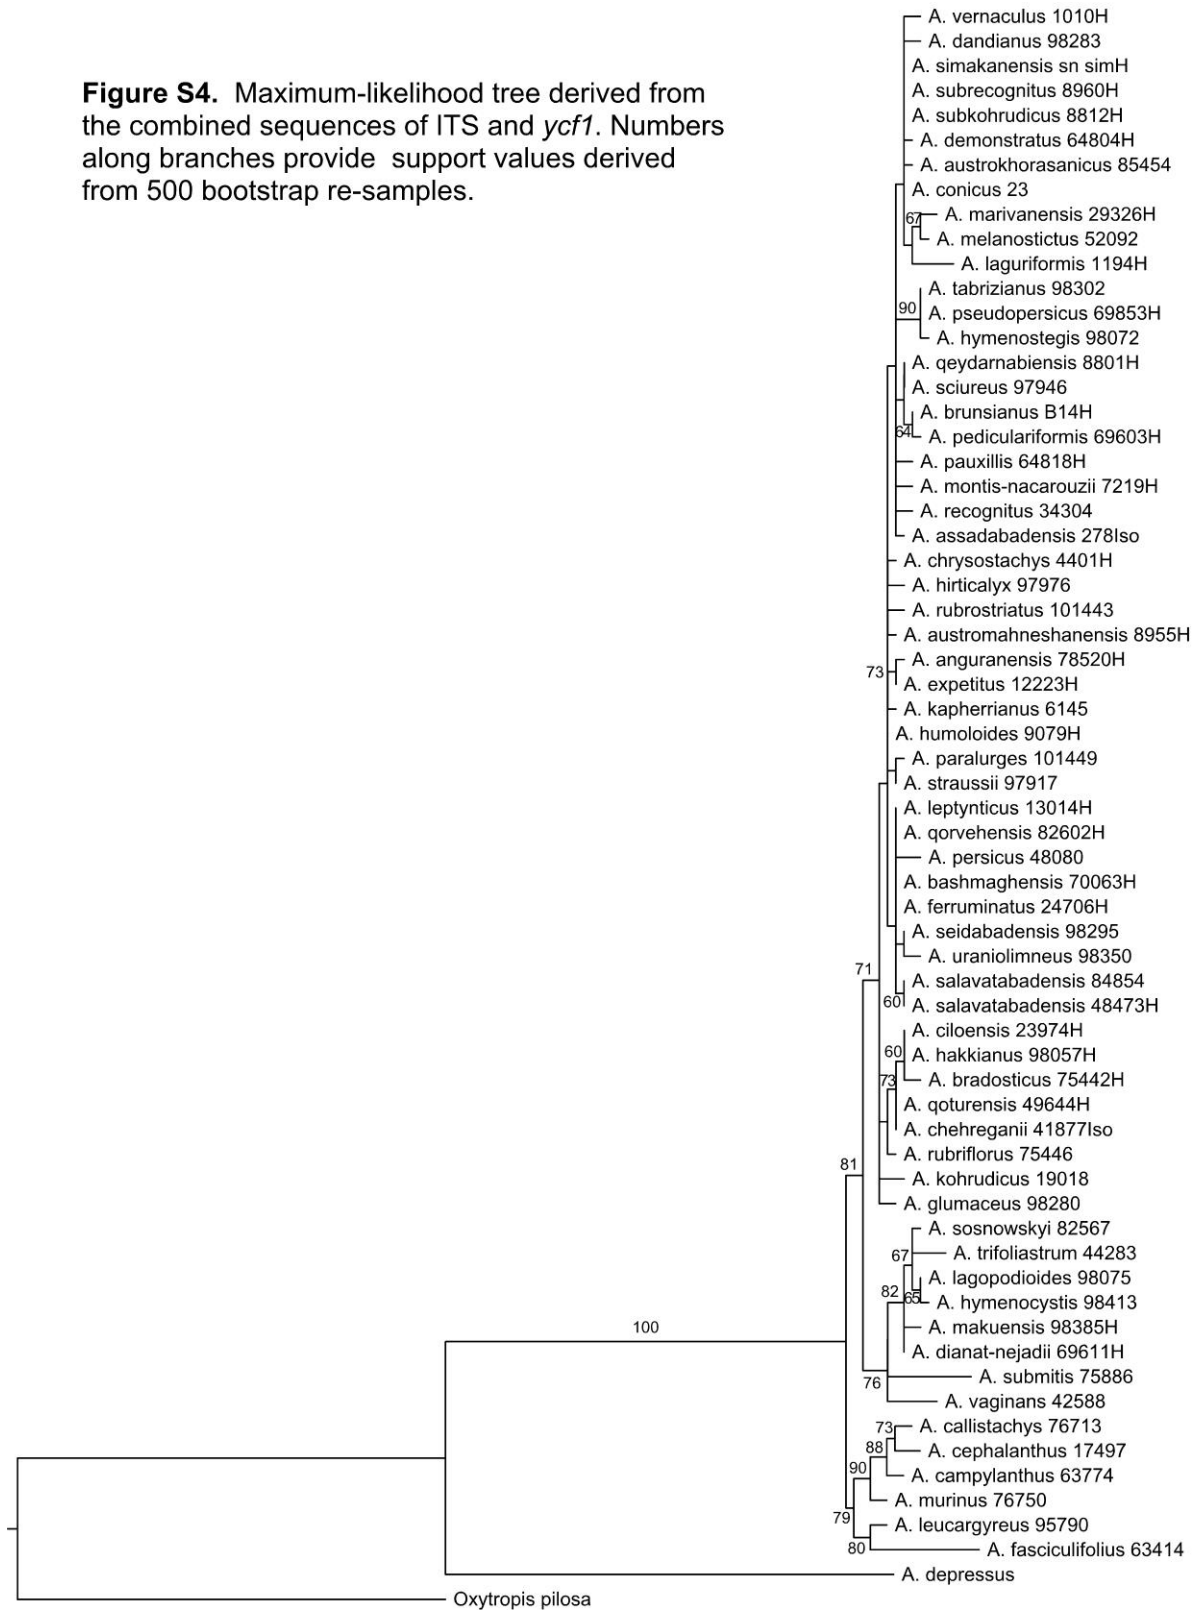

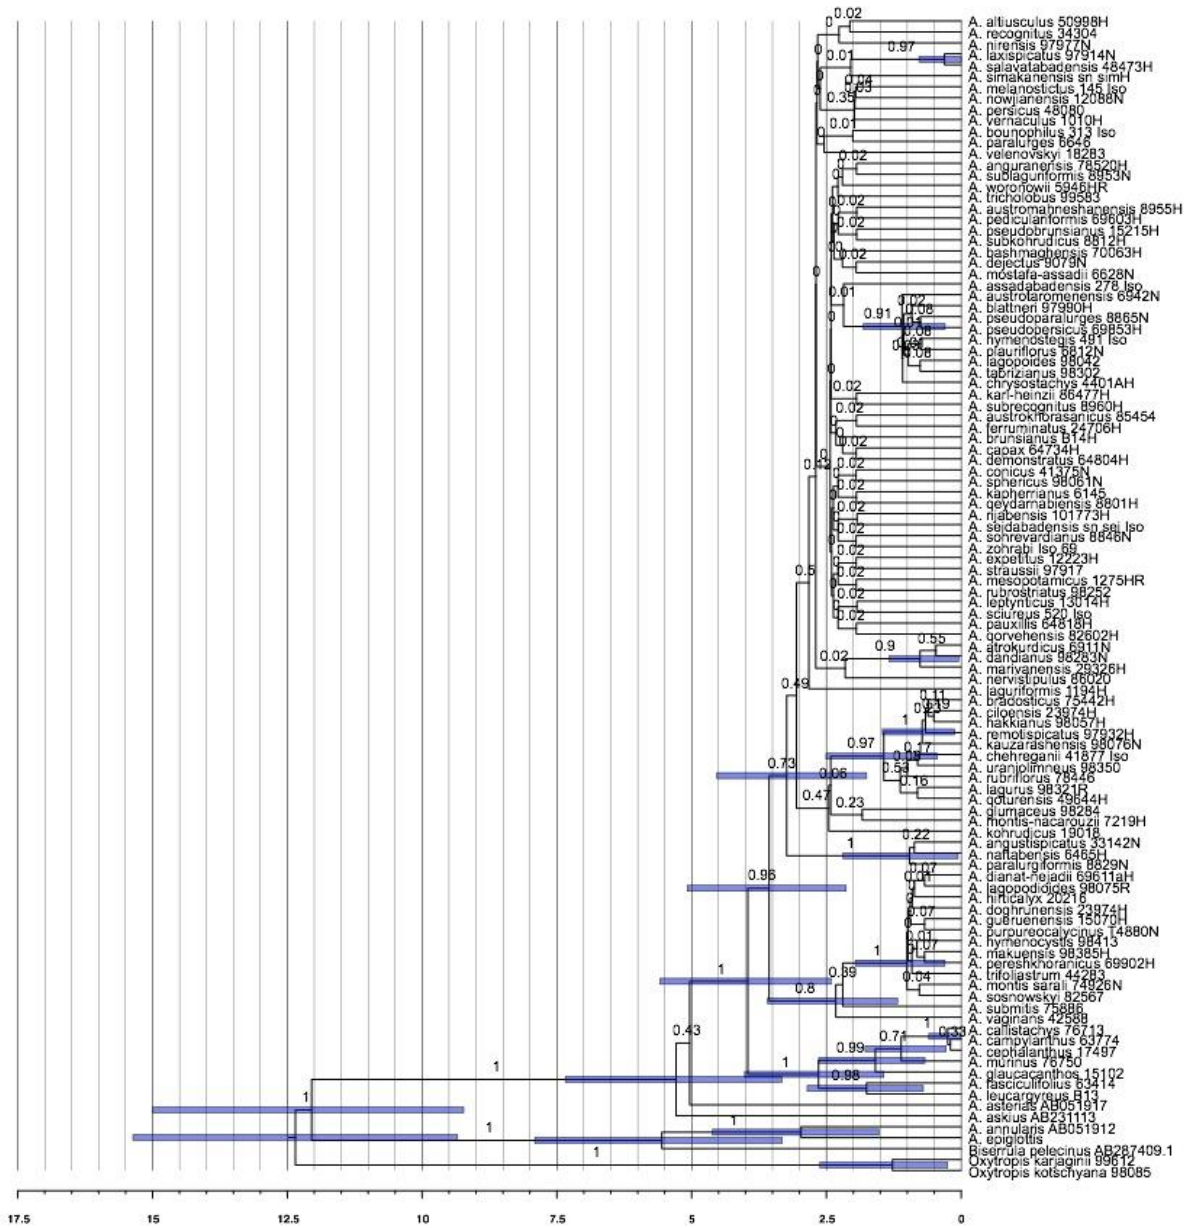

**Figure S5.** Dated phylogeny calculated from nrDNA ITS sequences using the calibrated Yule prior and a secondary calibration on the crown group of *Astragalus* (including *Biserrula pelecinus*) and *Oxytropis* as a normal-distributed prior ( $12.4 \pm 1.45$  My). Numbers along branches indicate Bayesian posterior probabilities >0.70. Node bars indicate 95% highest probability density intervals (HPDI) for the ages. The scale at the bottom provides a timeline in million years before present.
